2019\_JJPD\_SETI\_paper [for BioRxiv and JXB]

1       **Estradiol-inducible AvrRps4 expression reveals distinct properties of**  
2                   **TIR-NLR-mediated effector-triggered immunity**

3  
4       Bruno Pok Man Ngou<sup>1,2</sup>, Hee-Kyung Ahn<sup>1,2</sup>, Pingtao Ding<sup>1,2,\*</sup>, Amey Redkar<sup>1,3</sup>,  
5       Hannah Brown<sup>1</sup>, Yan Ma<sup>1</sup>, Mark Youles<sup>1</sup>, Laurence Tomlinson<sup>1</sup>, Jonathan DG  
6                   Jones<sup>1,\*</sup>

7  
8       1 The Sainsbury Laboratory, Norwich Research Park, Norwich NR4 7UH, UK

9       2 These authors contributed equally to this work

10      3 Department of Genetics, University of Córdoba, Córdoba 14071, Spain

11

12      \* For correspondence: [pingtao.ding@tsl.ac.uk](mailto:pingtao.ding@tsl.ac.uk); [jonathan.jones@tsl.ac.uk](mailto:jonathan.jones@tsl.ac.uk)

13

14      **Highlight**

15      Inducible expression of AvrRps4 activates RRS1/RPS4-mediated effector-  
16      triggered immunity without the presence of pathogens, allowing us to  
17      characterise downstream immune responses triggered by TIR-NLRs without  
18      cell-surface receptor-mediated immunity.

19

20      **Abstract**

21      Plant nucleotide-binding domain, leucine-rich repeat receptor (NLR) proteins  
22      play important roles in recognition of pathogen-derived effectors. However,  
23      the mechanism by which plant NLRs activate immunity is still largely unknown.  
24      The paired Arabidopsis NLRs RRS1-R and RPS4, that confer recognition of  
25      bacterial effectors AvrRps4 and PopP2, are well studied, but how the  
26      RRS1/RPS4 complex activates early immediate downstream responses upon  
27      effector detection is still poorly understood. To study RRS1/RPS4 responses  
28      without the influence of cell-surface receptor immune pathways, we generated  
29      an Arabidopsis line with inducible expression of effector AvrRps4. Induction  
30      does not lead to hypersensitive cell death response (HR) but can induce  
31      electrolyte leakage, which often correlates with plant cell death. Activation of  
32      RRS1 and RPS4 without pathogens cannot activate mitogen-associated

2019\_JJPD\_SETI\_paper [for BioRxiv and JXB]

33 protein kinase cascades, but still activates upregulation of defense genes, and  
34 therefore resistance against bacteria.

35

### 36 **Keywords**

37 Plant innate immunity, NLR activation, protein complex, hypersensitive  
38 response, cell death, MAP kinase, defense gene expression, estradiol-  
39 inducible expression system, Golden Gate modular cloning

40

### 41 **Introduction**

42 To investigate plant immunity, researchers routinely conduct pathogen  
43 inoculations on plants in a controlled environment. Upon pathogen attack,  
44 plants activate innate immune responses via both membrane-associated and  
45 intracellular receptors, which makes it difficult to unravel the distinct  
46 contribution of each component. Most plasma-membrane localized receptors  
47 perceive conserved pathogen-associated molecular patterns (PAMPs) or  
48 host-cell-derived damage-associated molecular patterns (DAMPs) and  
49 activate PAMP-triggered immunity (PTI) or DAMP-triggered immunity (DTI).  
50 Plant intracellular immune receptors belong to a family of nucleotide-binding  
51 leucine-rich repeat (NB-LRR) proteins, also known as NLRs. NLRs recognize  
52 pathogen effectors and activate effector-triggered immunity (ETI), which often  
53 leads to accumulation of reactive oxygen species (ROS) and a hypersensitive  
54 cell death response (HR). Most plant NLRs carry either coiled-coil (CC) or  
55 Toll/interleukin-1 receptor (TIR) N-terminal domains. Both CC and TIR  
56 domains are believed to function in signaling upon activation of NLRs, but the  
57 detailed mechanisms are unknown. Many CC-NLRs localize at and function in  
58 association with the plasma membrane, whereas TIR-NLRs can function in  
59 diverse locations, including the nucleus. Regardless of the distinct localization  
60 patterns between CC- and TIR-NLRs, their downstream outputs culminate in  
61 elevated resistance, but have never been directly compared side-by-side. To  
62 study the specific immune outputs generated by ETI, inducible expression  
63 tools have been applied (McNellis *et al.*, 1998; Tornero *et al.*, 2002; Allen *et*  
64 *al.*, 2004; Porter *et al.*, 2012).

65 In Arabidopsis, functionally paired NLRs RRS1-R and RPS4 confer resistance  
66 against a soil-borne bacterial pathogen *Ralstonia solanacearum* through the

2019\_JJPD\_SETI\_paper [for BioRxiv and JXB]

67 recognition of an effector PopP2 secreted via Type III secretion system and a  
68 hemibiotrophic ascomycetous fungal pathogen *Colletotrichum higginsianum*  
69 (Narusaka *et al.*, 2009). They can also confer resistance against bacteria  
70 *Pseudomonas syringae* pv. *tomato* DC3000 carrying AvrRps4, an effector  
71 protein from *Pseudomonas syringae* pv. *pisi*, causing bacterial blight in *Pisum*  
72 *sativum* (pea) (Sohn *et al.*, 2009; Narusaka *et al.*, 2009). Previously, it was  
73 known that the 135th to 138th residues of AvrRps4, KR<sub>3</sub>VY, are required for  
74 the recognition of AvrRps4 by RRS1 and RPS4 (Sohn *et al.*, 2009). Crystal  
75 structure information of RRS1 and RPS4 on the TIR domains and the co-  
76 crystal structures between RRS1-R WRKY domain and effector PopP2 have  
77 indicated some structural basis of how RRS1/RPS4 have been activated  
78 (Williams *et al.*, 2014; Zhang *et al.*, 2017). However, it is still unknown how the  
79 protein complex assembles and functions.

80 Here we report tools for studying the immune complex of RRS1-R and RPS4  
81 *in vivo*. We established a set of transgenic Arabidopsis lines to study  
82 RRS1/RPS4-mediated ETI in the absence of pathogens. Using these lines,  
83 we show that some but not all immune outputs induced by the conditionally  
84 expressed AvrRps4 resemble other reported effector-inducible lines.

85

## 86 **Materials and Methods**

87 Plant material and growth conditions

88 *Arabidopsis thaliana* accessions Wassilewskija-2 (Ws-2) and Columbia-0  
89 (Col-0) were used as wild type in this study. The *eds1-2* mutant used has  
90 been described previously (Falk *et al.*, 1999). Seeds were sown on compost  
91 and plants were grown at 21°C with 10 hours under light and 14 hours in dark,  
92 and at 70% humidity. Tabaco plants were grown at 22°C with 16 hours under  
93 light and 8 hours in dark, and at 80% constant humidity. The light level is  
94 approximately 180-200 μmol with fluorescent tubes.

95

96 FastRed selection for transgenic Arabidopsis

97 Seeds harvested from the Agrobacteria-transformed Arabidopsis are  
98 resuspended in 0.1% Agarose and exposed under fluorescence microscope  
99 with DsRed (red fluorescent protein) filter. Seeds with bright red fluorescence  
100 are selected as the positive transformants.

2019\_JJPD\_SETI\_paper [for BioRxiv and JXB]

101

## 102 GUS staining

103 *Nicotiana benthamiana* (*N. b.*) leaves were infiltrated with Agrobacteria  
104 carrying constructs with  $\beta$ -glucuronidase (GUS) reporter gene expressed  
105 under selected Arabidopsis promoters (Table S1). Leaves were collected at 2  
106 days post infiltration (dpi), and vacuum-infiltrated with GUS staining buffer (0.1  
107 M sodium phosphate pH 7.0, 10 mM EDTA pH 7.0, 0.5 mM  $K_3Fe(CN)_6$ , 0.5  
108 mM  $K_4Fe(CN)_6$ , 0.76 mM 5-Bromo-4-chloro-3-indolyl- $\beta$ -D-glucuronide  
109 cyclohexylamine salt or X-Gluc, 0.04% Triton X-100). After vacuum-infiltration,  
110 the leaves were incubated at 37°C overnight in the dark. The leaves were  
111 rinsed with 70% ethanol until the whole leaf de-stains to a clear white.

112

## 113 Immunoblotting

114 *N. b.* leaves were infiltrated with Agrobacteria carrying our stacking constructs  
115 (Table S2). At 2 dpi, same leaves were infiltrated with either DMSO or 50  $\mu$ M  
116  $\beta$ -estradiol (E2) diluted in water. Samples were collected at 6 hpi of DMSO or  
117 E2 treatment, and snap-frozen in liquid nitrogen. Proteins were extracted  
118 using GTEN buffer (10% glycerol, 25 mM Tris pH 7.5, 1 mM EDTA, 150 mM  
119 NaCl) with 10 mM DTT, 1% NP-40 and protease inhibitor cocktail  
120 (cOmplete™, EDTA-free; Merck). For *Arabidopsis* seedlings, seedlings grown  
121 for 8 days after germination were treated with DMSO or E2 with indicated time  
122 points and snap-frozen in liquid nitrogen. After centrifugation at 13,000 rpm for  
123 15 minutes to remove cell debris, protein concentration of each sample was  
124 measured using the Bradford assay (Protein Assay Dye Reagent Concentrate;  
125 Bio-Rad). After normalization, extracts were incubated with 3 $\times$  SDS sample  
126 buffer at 95°C for 5 minutes. 6% SDS-PAGE gels were used to run the protein  
127 samples. After transferring proteins from gels to PVDF membranes (Merck-  
128 Millipore) using Trans-Blot Turbo System (Bio-Rad), membranes were  
129 immunoblotted with HRP-conjugated Flag antibodies (Monoclonal ANTI-  
130 FLAG® M2-Peroxidase HRP antibody produced in mouse, A5892; Merck-  
131 Millipore), HRP-conjugated HA antibodies (12013819001; Merck-Roche) or  
132 Phospho-p44/42 MAPK (Erk1/2) (Thr202/Tyr204) (D13.14.4E) XP® Rabbit  
133 monoclonal antibody (4370; Cell Signaling Technology). Anti-Rabbit IgG  
134 (whole molecule)-Peroxidase antibody produced in goat (A0545; Merck-

2019\_JJPD\_SETI\_paper [for BioRxiv and JXB]

135 Sigma-Aldrich) was used as secondary antibody following the use of  
136 Phospho-p44/42 MAPK antibody.

137

138 Bacterial growth assay

139 *Pseudomonas syringae* pv. *tomato* strain DC3000 carrying pVSP61 empty  
140 vector was grown on selective King's B (KB) medium plates containing 15%  
141 (w/v) Agar, 25 µg/ml rifampicin and 50 µg/ml kanamycin for 48 h at 28°C.  
142 Bacteria were harvested from the plates, resuspended in infiltration buffer (10  
143 mM MgCl<sub>2</sub>) and the concentration was adjusted to an optical density of 0.001  
144 at 600 nm (OD<sub>600</sub>=0.001, representing approximately 5×10<sup>5</sup> colony forming  
145 units [CFU] ml<sup>-1</sup>). Bacteria were infiltrated into abaxial surfaces of 5-week-old  
146 Arabidopsis leaves with a 1-ml needleless syringe. For quantification, leaf  
147 samples were harvested with a 6-mm-diameter cork borer (Z165220; Merck-  
148 Sigma-Aldrich), resulting in leaf discs with an area of 0.283 cm<sup>2</sup>. Two leaf  
149 discs per leaf were harvested as a single sample. For each condition, four  
150 samples were collected immediately after infiltration as 'day 0' samples to  
151 ensure no significant difference introduced by unequal infiltrations and six  
152 samples were collected at 3 dpi as 'day 3' samples to compare the bacteria  
153 growth between different genotypes, conditions and treatments. For 'day 0',  
154 samples were ground in 200 µl of infiltration buffer and spotted (10 µl per spot)  
155 on selective KB medium agar plates to grow for 48 h at 28°C. For 'day 3',  
156 samples were ground in 200 µl of infiltration buffer, serially diluted (5, 50, 500,  
157 5000 and 50000 times) and spotted (6 µl per spot) on selective KB medium  
158 agar plates to grow for 48 h at 28°C. The number of colonies (CFU per drop)  
159 was monitored and bacterial growth was represented as in CFU cm<sup>-2</sup> of leaf  
160 tissue. All results are plotted using ggplot2 in R (Wickham, 2009), and  
161 detailed statistics summary can be found in the supplemental materials.

162

163 HR assay in Arabidopsis

164 *Pseudomonas fluorescens* engineered with a type III secretion system (Pf0-1  
165 'EtHAn' strains) expressing one of wild-type or mutant effectors, AvrRps4,  
166 AvrRps4<sup>KRVY135-138AAAA</sup>, PopP2, PopP2<sup>C321A</sup>, AvrRpt2 or pVSP61 empty vector  
167 were grown on selective KB plates for 24 h at 28°C (Thomas *et al.*, 2009;  
168 Sohn *et al.*, 2014). Bacteria were harvested from the plates, resuspended in

2019\_JJPD\_SETI\_paper [for BioRxiv and JXB]

169 infiltration buffer (10 mM MgCl<sub>2</sub>) and the concentration was adjusted to  
170 OD<sub>600</sub>= 0.2 (10<sup>8</sup> CFU ml<sup>-1</sup>). The abaxial surfaces of 5-week-old Arabidopsis  
171 leaves were hand infiltrated with a 1-ml needleless syringe. Cell death was  
172 monitored 24 h after infiltration.

173

#### 174 Electrolyte leakage assay

175 Either 50 μM E2 or DMSO were hand infiltrated in 5-week-old Arabidopsis  
176 leaves with a 1-ml needleless syringe for electrolyte leakage assay. Leaf discs  
177 were taken with a 2.4-mm-diameter cork borer from infiltrated leaves. Discs  
178 were dried and washed in deionized water for 1 hour before being floated on  
179 deionized water (15 discs per sample, three samples per biological replicate).  
180 Electrolyte leakage was measured as water conductivity with a Pocket Water  
181 Quality Meters (LAQUAtwin-EC-33; Horiba) at the indicated time points. All  
182 results are plotted using ggplot2 in R (Wickham, 2009) , and detailed statistics  
183 summary can be found in the supplemental materials.

184

#### 185 Trypan blue staining

186 Either 50 μM E2 or DMSO were hand infiltrated in 5-week-old Arabidopsis  
187 leaves with a 1-ml needleless syringe for trypan blue staining. 6 leaves per  
188 sample were collected 24 hours after infiltration. Leaves were boiled in trypan  
189 blue solution (1.25 mg/ml trypan blue dissolved in 12.5% glycerol, 12.5%  
190 phenol, 12.5% lactic acid and 50% ethanol) in a boiling water bath for 1 min  
191 and de-stained by chloral hydrate solution (2.5 g/ml). De-stained leaves were  
192 mounted, and pictures were taken under on Leica fluorescent  
193 stereomicroscope M165FC. All images were taken with identical settings at  
194 2.5x magnification. Scale bar=0.5mm.

195

#### 196 Gene expression measurement by reverse transcription-quantitative 197 polymerase chain reaction (RT-qPCR)

198 For gene expression analysis, RNA was isolated from 5-week-old Arabidopsis  
199 leaves and used for subsequent RT-qPCR analysis. RNA was extracted with  
200 Quick-RNA Plant Kit (R2024; Zymo Research) and treated with RNase-free  
201 DNase (4716728001; Merck-Roche). Reverse transcription was carried out  
202 using SuperScript IV Reverse Transcriptase (18090050; ThermoFisher

2019\_JJPD\_SETI\_paper [for BioRxiv and JXB]

203 Scientific). qPCR was performed using a CFX96 Touch<sup>TM</sup> Real-Time PCR  
204 Detection System. Primers for qPCR analysis of *Isochorismate Synthase1*  
205 (*ICS1*), *Pathogenesis-Related1 (PR1)*, *AvrRps4* and *Elongation Factor 1*  
206 *Alpha (EF1 $\alpha$ )* are listed in Table S4. Data were analyzed using the double  
207 delta Ct method (Livak and Schmittgen, 2001). All results are plotted using  
208 ggplot2 in R (Wickham, 2009), and detailed statistics summary can be found  
209 in the supplemental materials.

210

211 Confocal laser scanning microscopy (CLSM) imaging

212 Transgenic plant materials were imaged with the Leica DM6000/TCS SP5  
213 confocal microscopy (Leica Microsystems) for confirmation of expression of  
214 inducible AvrRps4 fused with monomeric yellow-green fluorescent protein,  
215 mNeonGreen or mNeon (Shaner *et al.*, 2013). Roots from 3-week-old  
216 Arabidopsis seedlings were sprayed with 50  $\mu$ M E2 and imaged at 1 day post  
217 spray. Fluorescence of mNeon was excited at 500 nm and detected at  
218 between 520 and 540 nm. CLSM images of root cells from Arabidopsis  
219 seedlings are recorded via the camera. The images were analyzed with the  
220 Leica application Suite and Fiji software (Schindelin *et al.*, 2012).

221

222 Co-immunoprecipitation

223 Arabidopsis transgenic seedlings, and the background ecotype Col-0 grown  
224 for 7 days after germination (DAG) were treated with 0.1% DMSO or 50 $\mu$ M E2  
225 for 3 hours. Proteins from seedlings were extracted using IP buffer (10%  
226 Glycerol, 50mM Tris-Cl pH 6.8, 50mM KCl, 1mM EDTA, 5Mm MgCl<sub>2</sub>, 1% NP-  
227 40, 10mM DTT, 1mM dATP). Crude extract of the seedlings was centrifuged  
228 and supernatants were incubated with Anti-HA-conjugated beads (EZview<sup>TM</sup>  
229 Red Anti-HA Affinity Gel; E6779; Sigma). A small portion of supernatants  
230 were taken for input samples. At 2 hours after incubation of the extract with  
231 beads, beads were washed three times with IP buffer containing 0.1% NP-40.  
232 Proteins bound to beads were eluted by boiling the beads with SDS sample  
233 buffer. Immunoblotting of the input and eluted samples were performed as  
234 described above.

235

236 **Results**



2019\_JJPD\_SETI\_paper [for BioRxiv and JXB]

### 237 **RRS1 over-expression can compromise RPS1/RPS4 function**

238 Overexpression of *RPS4* leads to autoimmunity and dwarfism under standard  
239 growth condition (see methods) (Heidrich *et al.*, 2013). This autoimmunity is  
240 both temperature- and RRS1-dependent. In contrast, elevated expression of  
241 *RRS1-R* from ecotype *Ws-2* in *Col-0*, an ecotype expressing a dominant allele  
242 of *RRS1-S*, does not trigger auto-immunity (Huh *et al.* 2017). Furthermore,  
243 high level RRS1-R expression does not confer recognition of effector PopP2  
244 (Fig 1). Overexpression of *RRS1* in an *RPS4* overexpression line attenuates  
245 dwarfism and autoimmunity (Huh *et al.*, 2017). Here, we found that only  
246 simultaneously over-expressing both *RRS1* and *RPS4* can lead to the gain-of-  
247 recognition of PopP2 in the susceptible ecotype *Col-0* (Fig 1). Thus, we  
248 propose that a balanced protein expression of RRS1 and RPS4 is required for  
249 both suppressing autoimmunity and functional recognition of the  
250 corresponding effectors.

251

### 252 **A survey of leaf-expressed genes reveals promoters for moderate and** 253 **balanced expression levels of RRS1 and RPS4**

254 Genome-wide expression profiling has revealed numerous genes altered by  
255 PTI alone or PTI plus ETI at early time points of RRS1/RPS4-mediated  
256 immune activation (Sohn *et al.*, 2014). This analysis also enabled the  
257 discovery of genes that are moderately and constitutively expressed without  
258 changing their transcript abundance during immune activation. In plants, gene  
259 expression patterns and levels are usually specified by their promoters. Based  
260 on the endogenous expression relative transcript abundance in the 'stable  
261 gene set', we selected six promoters with 'moderate' expression (Table S1).  
262 We define the 'moderate' expression based on two criteria: (1) the gene  
263 transcript abundance with those promoters are at least 100 times more than  
264 the endogenous transcript abundance of *RRS1* and *RPS4*; (2) the gene  
265 transcript abundance with those promoters is lower than that with the 35S  
266 promoter. The selected genes encode proteins that are involved in essential  
267 biological processes that we expect to be expressed in most mesophyll cells,  
268 including a delta-tonoplast intrinsic protein (our name; At1, locus identifier  
269 AT3G16240, protein symbol name TIP2-1), a ribosomal protein S16 (At2,  
270 AT4G34620, RPS16-1), a cysteine synthase isomer CysC1 (At3, AT3G61440,



2019\_JJPD\_SETI\_paper [for BioRxiv and JXB]

271 CYSC1), a photosystem II subunit Q (At4, AT4G21280, PSBQ1), a xyloglucan  
272 endotransglucosylase/hydrolase 6 (At5, AT5G65730, XTH6), and a ubiquitin-  
273 like protein 5 (At6, AT5G42300, UBL5) (Table S1).

274 To test the strength of the selected Arabidopsis promoters (pAt1-pAt6) for  
275 driving gene expression *in planta*, constructs were designed and generated to  
276 use them to express  $\beta$ -glucuronidase (GUS) (pAt:GUS). *Agrobacterium*  
277 strains carrying each pAt:GUS construct was infiltrated in tobacco leaves with  
278 the infiltration buffer as negative control and GUS expressed under the CaMV  
279 35S promoter (35S:GUS) as positive control. GUS expressed under pAt4  
280 shows similar level of activity to that with 35S, whereas GUS activities  
281 detected from other pAt promoters are significantly weaker (Fig S1).

282

### 283 **A T-DNA construct expresses RPS4, RRS1 and inducible AvrRps4**

284 We designed a binary vector to reconstruct the effector ligand AvrRps4 and its  
285 receptors RRS1 and RPS4, using the Golden Gate Modular Cloning Toolbox  
286 (Fig 2A) (Engler *et al.*, 2014). We chose moderate and balanced promoters  
287 pAt2 and pAt3 from our promoter survey experiment for expressing RRS1 and  
288 RPS4, respectively. We have also cloned *RRS1-R* full-length coding  
289 sequences (CDS) from *Ws-2* and *RPS4* full-length CDS from *Col-0* for the  
290 expression of RRS1-R and RPS4 proteins. We chose synthetic C-terminal-  
291 fusion epitope tags His<sub>6</sub>-TEV-FLAG<sub>3</sub> (HF) and HA<sub>6</sub> for detecting RRS1 and  
292 RPS4 protein expressions, respectively (Fig 2A, Table S2) (Gauss *et al.*, 2005;  
293 Soleimani *et al.*, 2013). We have used an E2-inducible system for AvrRps4  
294 expression (Zuo *et al.*, 2000). We named this multi-gene stacking binary  
295 construct 'Super ETI', or SETI. All restriction enzyme sites for BsaI and BpI  
296 modules for promoters, CDSs for genes or epitope tags and the terminators  
297 were synonymously eliminated (Fig 2A, Table S1). More detailed information  
298 for the cloning can be found in supplemental materials.

299 To verify the SETI construct, we used a transient expression system in  
300 *Nicotiana benthamiana* by infiltrating *Agrobacteria* that deliver the SETI T-  
301 DNA. Protein accumulation of RRS1-R-HF and RPS4-HA was detected (Fig  
302 S2).

303

2019\_JJPD\_SETI\_paper [for BioRxiv and JXB]

304 **The single-locus lines carrying the SETI T-DNA show inducible growth**  
305 **arrest**

306 We generated transgenic Arabidopsis lines using the SETI construct  
307 expressing wild-type AvrRps4 (SETI\_WT). With the FastRed selection module,  
308 we have selected several positive SETI\_WT lines (see Materials and Methods,  
309 Table S2, Fig S3). We confirmed protein expression of RRS1-R-HF and  
310 RPS4-HA (Fig 2B). We also tested the expression of inducible AvrRps4-  
311 mNeon under fluorescence microscope upon the treatment with E2.  
312 mNeonGreen signal was detected at 24 hours post spray on transgenic  
313 seedlings, consistent with the mRNA accumulation of *AvrRps4* at 4 hours post  
314 E2-infiltration in leaves (Fig 2D, Fig S2C). On E2-containing growth medium,  
315 SETI\_WT transgenic lines display severe growth arrest (Fig 2C, Fig S3). We  
316 selected one of the lines (SETI\_WT) for subsequent experiments (Fig 2C, Fig  
317 S3).

318

319 **RRS1-R and RPS4 form pre-activation complexes in Arabidopsis**

320 The SETI lines enable detection of epitope-tagged RRS1-R and RPS4 (Fig  
321 2B). We investigated in vivo interaction of tagged RRS1-R and RPS4 by co-  
322 immunoprecipitation (co-IP). When RPS4-HA was immunoprecipitated using  
323 HA beads, we found RRS1-R and RPS4 stay in association with each other  
324 both before and 3 hours after the induction of *AvrRps4* expression (Fig 3).  
325 There were no significant differences of RRS1-R and RPS4 association upon  
326 *AvrRps4* induction. While all previous studies in interactions of RRS1-R and  
327 RPS4 was tested only using *N. benthamiana* transient expression system  
328 (Huh *et al.*, 2017), generation of SETI line enabled the detection of RRS1-R  
329 and RPS4 interaction in its native system in Arabidopsis.

330

331 **Some but not all defense responses are induced by E2 in SETI lines**

332 The induced expression of multiple effectors, such as AvrRpt2, AvrRpm1 and  
333 ATR13 can induce cell death or named macroscopic HR in Arabidopsis  
334 leaves (McNellis *et al.*, 1998; Tornero *et al.*, 2002; Allen *et al.*, 2004). We  
335 therefore tested whether induced expression of AvrRps4 can trigger  
336 macroscopic HR in Arabidopsis. As seen in Fig 4A, no HR can be observed  
337 after AvrRps4 expression is induced in the SETI leaves. However, only the

2019\_JJPD\_SETI\_paper [for BioRxiv and JXB]

338 expression of AvrRps4 but not mutant AvrRps4 (here referred to as  
339 AvrRps4\_KRVYmut<sub>t</sub>, with residues KRVY 135 to 138 mutated into AAAA)  
340 leads to electrolyte leakage (Fig 4C). We also observed slightly stronger  
341 trypan blue stains in the SETI leaves treated with E2 compared to mock  
342 treatment; suggesting that the expression of AvrRps4 causes microscopic or  
343 weak but not macroscopic or strong HR in contrast to other known inducible  
344 effector lines (Fig 4B).

345 Salicylic acid induction is another hallmark of ETI (Castel *et al.*, 2019).  
346 Enzymes such as Isochorismate Synthase 1 (ICS1), Enhanced Disease  
347 Susceptibility 5 (EDS5) and AvrPphB Susceptible 3 (PBS3) are involved in the  
348 biosynthesis of salicylic acid and the expression of these genes is also highly  
349 induced during ETI (Sohn *et al.*, 2014). The expression of *ICS1* after the  
350 *AvrRps4* induction was tested by quantitative real-time PCR. *ICS1* was highly  
351 induced 4 hours after the induction of *AvrRps4* by E2 (Fig 5A). In contrast,  
352 *Pathogenesis-Related protein 1 (PR1)* was highly induced only 8 hours after  
353 the induction of *AvrRps4* (Fig 5B). This shows that ETI triggered by  
354 RRS1/RPS4 is sufficient for the induction of *ICS1* and the biosynthesis of  
355 salicylic acid, which subsequently leads to expression of *PR1*.

356 Activation of mitogen-activated protein kinases (MAPKs) by PTI has been  
357 reported under many cases and happens within a few minutes of the  
358 activation of PTI. However, the activation of MAPKs by ETI is slower and lasts  
359 longer than PTI-induced MAPK activation (Tsuda *et al.* 2013). We tested  
360 whether the induced expression of *AvrRps4* can lead to MAPK activation in  
361 SETI\_WT and control lines. In contrast to AvrRpt2-inducible transgenic  
362 Arabidopsis plants, induced expression of *AvrRps4* does not activate MAPKs  
363 (Fig 5C) (Tsuda *et al.* 2013).

364 We further tested if the induction of ETI would elevate resistance. We  
365 infiltrated the leaves with E2 or mock solution one day before we infiltrated  
366 plants with *Pst* DC3000 (Materials and Methods). SETI\_WT plants pre-treated  
367 with E2 are more resistant to the bacteria than those pre-treated with mock,  
368 while there was no significant difference between E2 and mock pre-treatment  
369 in Col-0 (Fig 6).

370

371 **Discussion**

2019\_JJPD\_SETI\_paper [for BioRxiv and JXB]

372 To facilitate studying the functional complex of RRS1 and RPS4 *in vivo*, we  
373 generated an expression construct of E2-inducible AvrRps4 stacked with  
374 epitope-tagged RRS1 and RPS4. To achieve balanced expression levels  
375 higher than endogenous expression of *RRS1* and *RPS4*, we surveyed  
376 constitutively expressed gene promoters. Here, we report 6 new and tested  
377 promoter modules that are compatible with the Golden Gate Modular Cloning  
378 toolkit. We used two of the promoters to express *RRS1* and *RPS4*, and we  
379 avoided autoimmunity induced by excessive expression of *RPS4* or non-  
380 recognition of PopP2 cause by excessive expression of *RRS1-R*. We were  
381 also able to generate inducible AvrRps4 expression to activate RRS1/RPS4-  
382 mediated ETI under the control of E2 treatment. We thus were able to stack  
383 genes for inducible expression of a pathogen effector and its NLR receptors in  
384 one construct. In addition, with the epitope tags, we are able to monitor  
385 effector-dependent changes in the NLR proteins without interference from  
386 using a pathogen effector-delivery system. We could thus express any  
387 effectors or pathogen ligands that will trigger immunity in plant cells with the  
388 E2-inducible module, and their immune receptors using the same gene  
389 stacking strategy.

390 There are multiple advantages to enabling investigation of ETI without the  
391 complication of co-activating PTI. Firstly, we could test the contribution of  
392 other genes to ETI activation by introducing mutants into the SETI  
393 background, either using conventional crossing or using genome-editing such  
394 as CRISPR/Cas9. These lines can also help investigating downstream  
395 signaling from plant NLRs. Multiple forward genetic screens have been  
396 conducted, but few novel components have been found, and most mutations  
397 are either in the NLRs or regulatory elements rather than signaling  
398 components (van Wersch *et al.*, 2016). Another plausible explanation is that  
399 the signaling path downstream of plants NLRs is very short, but this is  
400 debatable, because several significant steps are required for immunity. EDS1,  
401 PAD4 and SAG101 are required for TIR-NLR signaling (Falk *et al.*, 1999;  
402 Gantner *et al.*, 2019). NRC family proteins in Solanaceae species required for  
403 many NLRs, and NRG1/ADR1s in Arabidopsis required for TIR-NLRs and  
404 ADR1s for some CC-NLRs (Bonardi *et al.*, 2011; Dong *et al.*, 2016; Wu *et al.*,  
405 2017, 2019; Castel *et al.*, 2019). NRG1s and ADR1s seem to function

2019\_JJPD\_SETI\_paper [for BioRxiv and JXB]

406 downstream of EDS1 and may function distinctly with SAG101 and PAD4,  
407 respectively (Lapin *et al.*, 2019). SETI lines carry heterologously expressed  
408 RRS1-R/RPS4 and also endogenous RRS1-S/RPS4, RRS1B/RPS4B, which  
409 together provide three redundant copies of NLR pairs that can recognize  
410 AvrRps4. In theory, in an EMS-mutagenesis forward genetic screen to identify  
411 suppressors of immunity induced by AvrRps4, there should be a reduced  
412 background of mutations in the receptor(s), improving prospects to reveal  
413 mutations in genes that are functionally important in NLR signaling and  
414 regulation.

415 With SETI, we are able to assess pure ETI response mediated by the TIR-  
416 NLRs, RRS1 and RPS4. E2 induction provoked rapid transcriptional changes  
417 in activation of defense genes and also ion leakage. AvrRps4-induced ETI  
418 enhanced resistance against bacterial pathogens. However, neither MAPK  
419 activation nor macroscopic HR, in contrast to other inducible ETI examples  
420 (Tornerio *et al.*, 2002; Tsuda *et al.*, 2013). This indicates that outputs of plant  
421 NLRs might differ. Both TIR and CC domains alone are sufficient to activate  
422 plant immunity. However, whether they signal through similar or different  
423 downstream components is still unknown.

424 In diverse multicellular eukaryotes, immune complexes are assembled into  
425 oligomeric complexes to signal downstream. The mammalian inflammasome,  
426 assembled in response to bacterial peptide recognition by NAIP proteins and  
427 subsequent activation and binding of NLRC4 proteins, is a classic example  
428 (Zhang *et al.*, 2015). The plant CC NLR ZAR1 forms an effector-dependent  
429 resistosome, which is a pentamer of ZAR1 assembled together with cofactors  
430 PBL2 and RKS1 (Wang *et al.*, 2019). The structure of TIR domains implies  
431 that activation might require the disassociation of the RRS1 and RPS4 TIR  
432 domains and the oligomerization of RPS4 TIR domains (Williams *et al.*, 2014).  
433 In SETI lines, RRS1 and RPS4 form a pre-activation complex in the absence  
434 of pathogen effector. However, co-IP data cannot distinguish the ratio of  
435 which RRS1 and RPS4 bind to each other. It will be interesting to check via  
436 various non-denaturing methods if RRS1-R and RPS4 form a dimer or a  
437 higher order oligomerization *in vivo*, or whether there is a conformational  
438 change in complex upon effector recognition. Furthermore, with the SETI lines

2019\_JJPD\_SETI\_paper [for BioRxiv and JXB]

439 generated in this study, we can ask what other co-factors are required for the  
440 activation of RRS1-R and RPS4 at native conditions.

441 The availability of SETI lines also will enable us to study how PTI and ETI  
442 interact with each other, especially in the context of RRS1- and RPS4-  
443 mediated immunity. Some models have been proposed in discussing on this  
444 topic (Tsuda *et al.*, 2009; Cui *et al.*, 2015). From the zig-zag model, PTI and  
445 ETI holds in different threshold on activating immunity (Jones and Dangl,  
446 2006). With SETI line, we could specifically ask how physically PTI and ETI  
447 can influence each other. A lot of evidence shows that the PTI receptors  
448 PRRs usually have very specific post-translational modification events at early  
449 time points, there is also some evidence showing ETI can activate somewhat  
450 overlapping but different PTMs on immune-related proteins (Withers and  
451 Dong, 2017; Kadota *et al.*, 2019). It will be interesting to know how the  
452 activation of RRS1/PRS4 leads to the changes of PTMs and how those  
453 changes contribute to the robustness of immunity. In addition, transcriptional  
454 changes are not the only process reported as the early changes of ETI but  
455 also the changes in translations (Meteignier *et al.*, 2017; Xu *et al.*, 2017). Both  
456 work using inducible AvrRpm1 or AvrRpt2 reveal interesting observations on  
457 trade-off between defense and growth, and the specific regulatory element in  
458 the genome (Meteignier *et al.*, 2017; Xu *et al.*, 2017). Both effectors are  
459 recognized by CC-type NLRs, so it will be interesting to know what changes in  
460 translations will be induced by TIR-NLRs using SETI line. One can also use  
461 proteomics tools to generate complex information using inducible SETI to fish  
462 for ETI-specific interaction networks.

463 Recently it has been shown plant NLRs can also form higher order protein  
464 complex, similar to inflammasome in mammalian immune system. However, it  
465 is unknown if all plant NLRs form the same kind of complex or using the same  
466 mechanism to activate defense. It was noted that NLRs have evolved to  
467 partner with other NLRs to function genetically, but if this model is also true  
468 biochemically is still unknown (Adachi *et al.*, 2019). Unlike ZAR1, RRS1 and  
469 RPS4 requires each other to function, and they localized and function  
470 exclusively in the nuclei but not the cell membrane, so it will be interesting to  
471 compare them once the transmission electron cryomicroscopic (Cryo-EM)  
472 structure of RRS1 and RPS4 complex is resolved. SETI line could be a very



2019\_JJPD\_SETI\_paper [for BioRxiv and JXB]

473 good toolkit to make mutagenesis to verify the function based on the structural  
474 information.

475 We have observed the activation of ETI alone in the absence of pathogens is  
476 sufficient to prime the resistance against bacterial pathogens in *Arabidopsis*  
477 (Fig 6). Previously, we have reported a group of upregulated genes at the  
478 early time point of activation of RRS1-R/RPS4 are related to salicylic acid  
479 pathway, so it will be interesting to know if the elevated or primed resistance  
480 against bacteria induced in SETI lines are due to the activation of salicylate  
481 pathway (Sohn *et al.*, 2014).

482 Another major question regarding the signaling pathways is that SAG101 and  
483 PAD4 seems to be redundant but functionally equivalent to EDS1 (Wagner *et al.*,  
484 2013; Lapin *et al.*, 2019). They also have been shown to be genetically  
485 linked to helper NLRs NRG1s and/or ADR1s to function (Castel *et al.*, 2019;  
486 Wu *et al.*, 2019). Using SETI line, one can test their function more specifically  
487 in ETI in the absence of PTI and many other unwanted pathogen  
488 interferences.

489

#### 490 **Acknowledgements**

491 We thank the Gatsby Foundation (United Kingdom) for funding to the JDGJ  
492 laboratory. BN was supported by the Norwich Research Park (NRP)  
493 Biosciences Doctoral Training Partnership (DTP) from the Biotechnology and  
494 Biological Sciences Research Council (BBSRC) (grant agreement  
495 BB/M011216/1). HA were supported by European Research Council  
496 Advanced Grant “ImmunitybyPairDesign”. PD acknowledges support from the  
497 European Union’s Horizon 2020 Research and Innovation Program under  
498 Marie Skłodowska-Curie Actions (grant 656243) and a Future Leader  
499 Fellowship from BBSRC (BB/R012172/1). AR acknowledge support from the  
500 EMBO Long Term Fellowship (ALTF-842-2015). HB was supported by the  
501 NRP DTP funding from BBSRC (grant agreement BB/M011216/1). YM were  
502 supported by Biotechnology and Biological Sciences Research Council  
503 (BBSRC) Grant BB/M008193/1. LT, MY and JDGJ were supported by the  
504 Gatsby Foundation funding to the Sainsbury Laboratory.

505

#### 506 **References**



2019\_JPD\_SETI\_paper [for BioRxiv and JXB]

- 507 **Adachi H, Derevnina L, Kamoun S.** 2019. NLR singletons, pairs, and networks:  
508 evolution, assembly, and regulation of the intracellular immunoreceptor circuitry of  
509 plants. *Current Opinion in Plant Biology* **50**, 121–131.
- 510 **Allen RL, Bittner-Eddy PD, Grenville-Briggs LJ, Meitz JC, Rehmany AP, Rose**  
511 **LE, Beynon JL.** 2004. Host-parasite coevolutionary conflict between Arabidopsis  
512 and downy mildew. *Science* **306**, 1957–1960.
- 513 **Bonardi V, Tang S, Stallmann A, Roberts M, Cherkis K, Dangl JL.** 2011.  
514 Expanded functions for a family of plant intracellular immune receptors beyond  
515 specific recognition of pathogen effectors. *Proceedings of the National Academy of*  
516 *Sciences of the United States of America* **108**, 16463–16468.
- 517 **Castel B, Ngou P-M, Cevik V, Redkar A, Kim D-S, Yang Y, Ding P, Jones JDG.**  
518 2019. Diverse NLR immune receptors activate defence via the RPW8-NLR NRG1.  
519 *The New Phytologist* **222**, 966–980.
- 520 **Cui H, Tsuda K, Parker JE.** 2015. Effector-triggered immunity: from pathogen  
521 perception to robust defense. *Annual review of plant biology* **66**, 487–511.
- 522 **Dong OX, Tong M, Bonardi V, El Kasmi F, Woloshen V, Wünsch LK, Dangl JL,**  
523 **Li X.** 2016. TNL-mediated immunity in Arabidopsis requires complex regulation of the  
524 redundant ADR1 gene family. *The New Phytologist* **210**, 960–973.
- 525 **Engler C, Youles M, Gruetzner R, Ehnert T-M, Werner S, Jones JDG, Patron NJ,**  
526 **Marillonnet S.** 2014. A golden gate modular cloning toolbox for plants. *ACS*  
527 *synthetic biology* [electronic resource] **3**, 839–843.
- 528 **Falk A, Feys BJ, Frost LN, Jones JD, Daniels MJ, Parker JE.** 1999. EDS1, an  
529 essential component of R gene-mediated disease resistance in Arabidopsis has  
530 homology to eukaryotic lipases. *Proceedings of the National Academy of Sciences of*  
531 *the United States of America* **96**, 3292–3297.
- 532 **Gantner J, Ordon J, Kretschmer C, Guerois R, Stuttmann J.** 2019. An EDS1-  
533 SAG101 Complex is Essential for TNL-mediated Immunity in *Nicotiana benthamiana*.  
534 *The Plant Cell*.
- 535 **Gauss R, Trautwein M, Sommer T, Spang A.** 2005. New modules for the repeated  
536 internal and N-terminal epitope tagging of genes in *Saccharomyces cerevisiae*. *Yeast*  
537 **22**, 1–12.
- 538 **Heidrich K, Tsuda K, Blanvillain-Baufumé S, Wirthmueller L, Bautor J, Parker**  
539 **JE.** 2013. Arabidopsis TNL-WRKY domain receptor RRS1 contributes to  
540 temperature-conditioned RPS4 auto-immunity. *Frontiers in plant science* **4**, 403.
- 541 **Huh SU, Cevik V, Ding P, Duxbury Z, Ma Y, Tomlinson L, Sarris PF, Jones JDG.**  
542 2017. Protein-protein interactions in the RPS4/RRS1 immune receptor complex.  
543 *PLoS Pathogens* **13**, e1006376.
- 544 **Jones JDG, Dangl JL.** 2006. The plant immune system. *Nature* **444**, 323–329.
- 545 **Kadota Y, Liebrand TWH, Goto Y, et al.** 2019. Quantitative phosphoproteomic  
546 analysis reveals common regulatory mechanisms between effector- and PAMP-  
547 triggered immunity in plants. *The New Phytologist* **221**, 2160–2175.
- 548 **Lapin D, Kovacova V, Sun X, et al.** 2019. A coevolved EDS1-SAG101-NRG1

2019\_JJPD\_SETI\_paper [for BioRxiv and JXB]

- 549 module mediates cell death signaling by TIR-domain immune receptors. BioRxiv.
- 550 **Livak KJ, Schmittgen TD.** 2001. Analysis of relative gene expression data using  
551 real-time quantitative PCR and the 2(-Delta Delta C(T)) Method. *Methods* **25**, 402–  
552 408.
- 553 **McNellis TW, Mudgett MB, Li K, Aoyama T, Horvath D, Chua NH, Staskawicz BJ.**  
554 1998. Glucocorticoid-inducible expression of a bacterial avirulence gene in  
555 transgenic Arabidopsis induces hypersensitive cell death. *The Plant Journal: for Cell*  
556 *and Molecular Biology* **14**, 247–257.
- 557 **Meteignier L-V, El Oirdi M, Cohen M, Barff T, Matteau D, Lucier J-F, Rodrigue S,**  
558 **Jacques P-E, Yoshioka K, Moffett P.** 2017. Translatome analysis of an NB-LRR  
559 immune response identifies important contributors to plant immunity in Arabidopsis.  
560 *Journal of Experimental Botany* **68**, 2333–2344.
- 561 **Narusaka M, Shirasu K, Noutoshi Y, Kubo Y, Shiraishi T, Iwabuchi M, Narusaka**  
562 **Y.** 2009. RRS1 and RPS4 provide a dual Resistance-gene system against fungal and  
563 bacterial pathogens. *The Plant Journal: for Cell and Molecular Biology* **60**, 218–226.
- 564 **Porter K, Shimono M, Tian M, Day B.** 2012. Arabidopsis Actin-Depolymerizing  
565 Factor-4 links pathogen perception, defense activation and transcription to  
566 cytoskeletal dynamics. *PLoS Pathogens* **8**, e1003006.
- 567 **Schindelin J, Arganda-Carreras I, Frise E, et al.** 2012. Fiji: an open-source  
568 platform for biological-image analysis. *Nature Methods* **9**, 676–682.
- 569 **Shaner NC, Lambert GG, Chammas A, et al.** 2013. A bright monomeric green  
570 fluorescent protein derived from Branchiostoma lanceolatum. *Nature Methods* **10**,  
571 407–409.
- 572 **Sohn KH, Segonzac C, Rallapalli G, Sarris PF, Woo JY, Williams SJ, Newman**  
573 **TE, Paek KH, Kobe B, Jones JDG.** 2014. The nuclear immune receptor RPS4 is  
574 required for RRS1SLH1-dependent constitutive defense activation in Arabidopsis  
575 thaliana. *PLoS Genetics* **10**, e1004655.
- 576 **Sohn KH, Zhang Y, Jones JDG.** 2009. The Pseudomonas syringae effector protein,  
577 AvrRPS4, requires in planta processing and the KRVY domain to function. *The Plant*  
578 *Journal: for Cell and Molecular Biology* **57**, 1079–1091.
- 579 **Soleimani VD, Palidwor GA, Ramachandran P, Perkins TJ, Rudnicki MA.** 2013.  
580 Chromatin tandem affinity purification sequencing. *Nature Protocols* **8**, 1525–1534.
- 581 **Thomas WJ, Thireault CA, Kimbrel JA, Chang JH.** 2009. Recombineering and  
582 stable integration of the Pseudomonas syringae pv. syringae 61 hrp/hrc cluster into  
583 the genome of the soil bacterium Pseudomonas fluorescens Pf0-1. *The Plant Journal:*  
584 *for Cell and Molecular Biology* **60**, 919–928.
- 585 **Tornero P, Chao RA, Luthin WN, Goff SA, Dangl JL.** 2002. Large-scale structure-  
586 function analysis of the Arabidopsis RPM1 disease resistance protein. *The Plant Cell*  
587 **14**, 435–450.
- 588 **Tsuda K, Mine A, Bethke G, Igarashi D, Botanga CJ, Tsuda Y, Glazebrook J,**  
589 **Sato M, Katagiri F.** 2013. Dual regulation of gene expression mediated by extended  
590 MAPK activation and salicylic acid contributes to robust innate immunity in  
591 Arabidopsis thaliana. *PLoS Genetics* **9**, e1004015.

2019\_JPD\_SETI\_paper [for BioRxiv and JXB]

- 592 **Tsuda K, Sato M, Stoddard T, Glazebrook J, Katagiri F.** 2009. Network properties  
593 of robust immunity in plants. *PLoS Genetics* **5**, e1000772.
- 594 **Wagner S, Stuttmann J, Rietz S, Guerois R, Brunstein E, Bautor J, Niefind K,**  
595 **Parker JE.** 2013. Structural basis for signaling by exclusive EDS1 heteromeric  
596 complexes with SAG101 or PAD4 in plant innate immunity. *Cell Host & Microbe* **14**,  
597 619–630.
- 598 **Wang J, Hu M, Wang J, Qi J, Han Z, Wang G, Qi Y, Wang H-W, Zhou J-M, Chai J.**  
599 2019. Reconstitution and structure of a plant NLR resistosome conferring immunity.  
600 *Science* **364**.
- 601 **van Wersch R, Li X, Zhang Y.** 2016. Mighty dwarfs: arabidopsis autoimmune  
602 mutants and their usages in genetic dissection of plant immunity. *Frontiers in plant*  
603 *science* **7**, 1717.
- 604 **Wickham H.** 2009. *ggplot2 - Elegant Graphics for Data Analysis* . New York, NY:  
605 Springer New York.
- 606 **Williams SJ, Sohn KH, Wan L, et al.** 2014. Structural basis for assembly and  
607 function of a heterodimeric plant immune receptor. *Science* **344**, 299–303.
- 608 **Withers J, Dong X.** 2017. Post-translational regulation of plant immunity. *Current*  
609 *Opinion in Plant Biology* **38**, 124–132.
- 610 **Wu C-H, Abd-El-Halim A, Bozkurt TO, Belhaj K, Terauchi R, Vossen JH,**  
611 **Kamoun S.** 2017. NLR network mediates immunity to diverse plant pathogens.  
612 *Proceedings of the National Academy of Sciences of the United States of America*  
613 **114**, 8113–8118.
- 614 **Wu Z, Li M, Dong OX, Xia S, Liang W, Bao Y, Wasteneys G, Li X.** 2019.  
615 Differential regulation of TNL-mediated immune signaling by redundant helper CNLs.  
616 *The New Phytologist* **222**, 938–953.
- 617 **Xu G, Greene GH, Yoo H, Liu L, Marqués J, Motley J, Dong X.** 2017. Global  
618 translational reprogramming is a fundamental layer of immune regulation in plants.  
619 *Nature* **545**, 487–490.
- 620 **Zhang L, Chen S, Ruan J, et al.** 2015. Cryo-EM structure of the activated NAIP2-  
621 NLRC4 inflammasome reveals nucleated polymerization. *Science* **350**, 404–409.
- 622 **Zhang Z-M, Ma K-W, Gao L, Hu Z, Schwizer S, Ma W, Song J.** 2017. Mechanism  
623 of host substrate acetylation by a YopJ family effector. *Nature Plants* **3**, 17115.
- 624 **Zuo J, Niu Q-W, Chua N-H.** 2000. An estrogen receptor-based transactivator XVE  
625 mediates highly inducible gene expression in transgenic plants. *The Plant Journal:*  
626 *for Cell and Molecular Biology* **24**, 265–273.

627

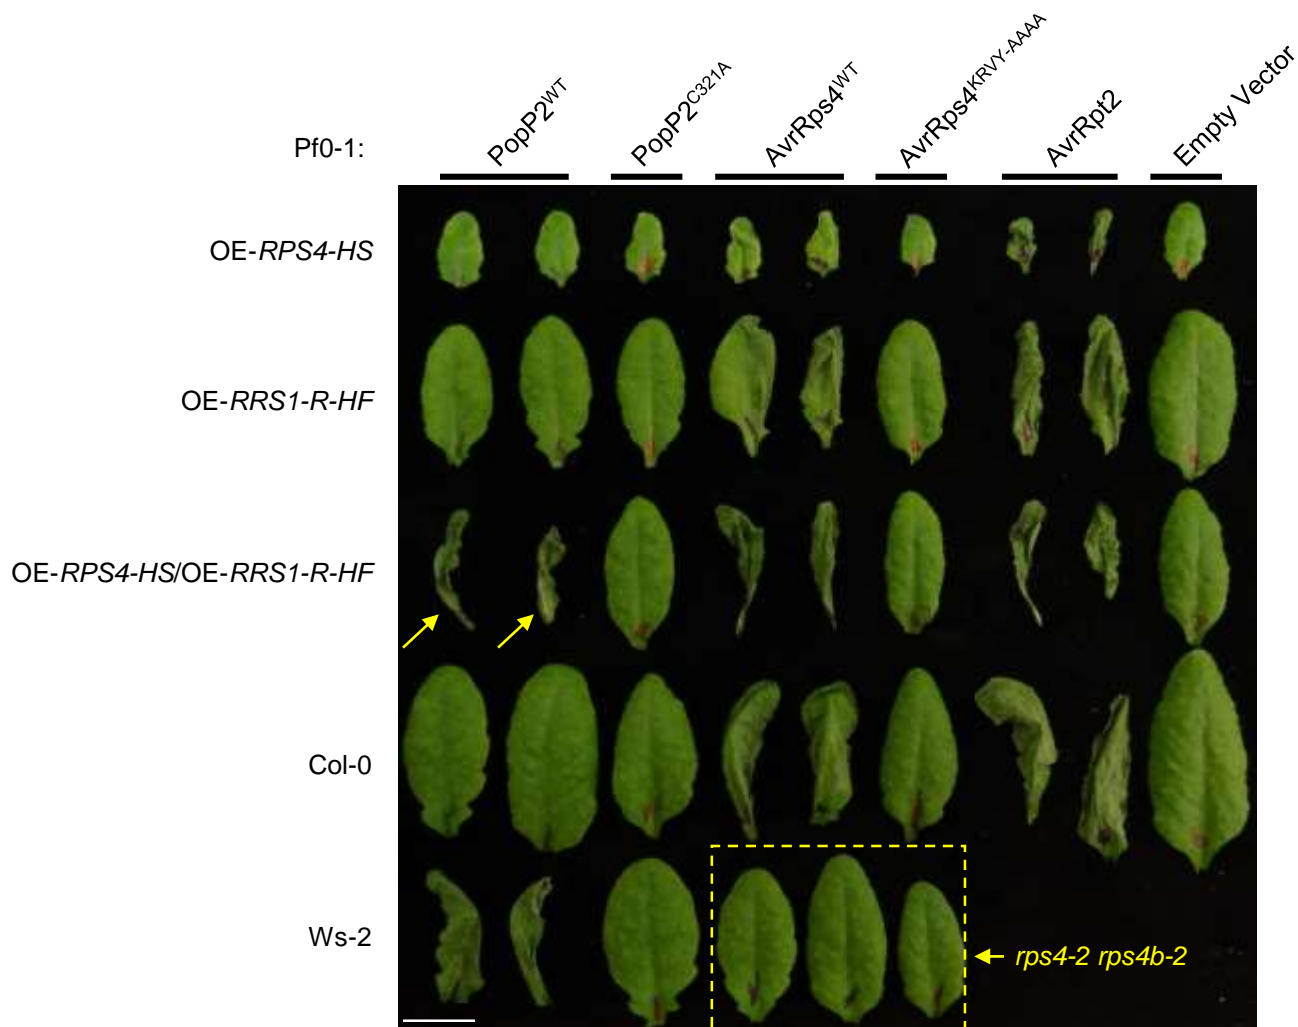

Fig. 1. Over-expression of *RPS4* and *RRS1-R* reconstruct the recognition of *PopP2* in *Col-0*. *Arabidopsis* transgenic lines overexpressing *RPS4* (OE-*RPS4*-HS), *RRS1-R* (OE-*RRS1-R*-HF) or both generated by crossing (OE-*RPS4*-HS/OE-*RRS1-R*-HF) in the *Col-0* background, with *Col-0* and *Ws-2* accession were tested for hypersensitive response (HR). 5-week old leaves were infiltrated with *Pseudomonas fluorescens* (Pf) 0-1 strains carrying empty vector (EV), wild-type (WT) *AvrRps4*, mutant *AvrRps4*<sup>KRVIY-AAAA</sup>, WT *PopP2*, mutant *PopP2*<sup>C321A</sup>, and WT *AvrRpt2*. Leaves were collected 1 day post infiltration (dpi) for imaging. Scale bar = 1cm. Yellow arrows indicate reconstructed *PopP2* recognition of *Col-0* background overexpressing *RRS1-R* and *RPS4*. Yellow dashed box highlights loss of *AvrRps4* recognition in the double mutant *rps4-2 rps4b-2*. Infiltration of EV and *AvrRpt2* serve as negative and positive controls of HR, respectively.

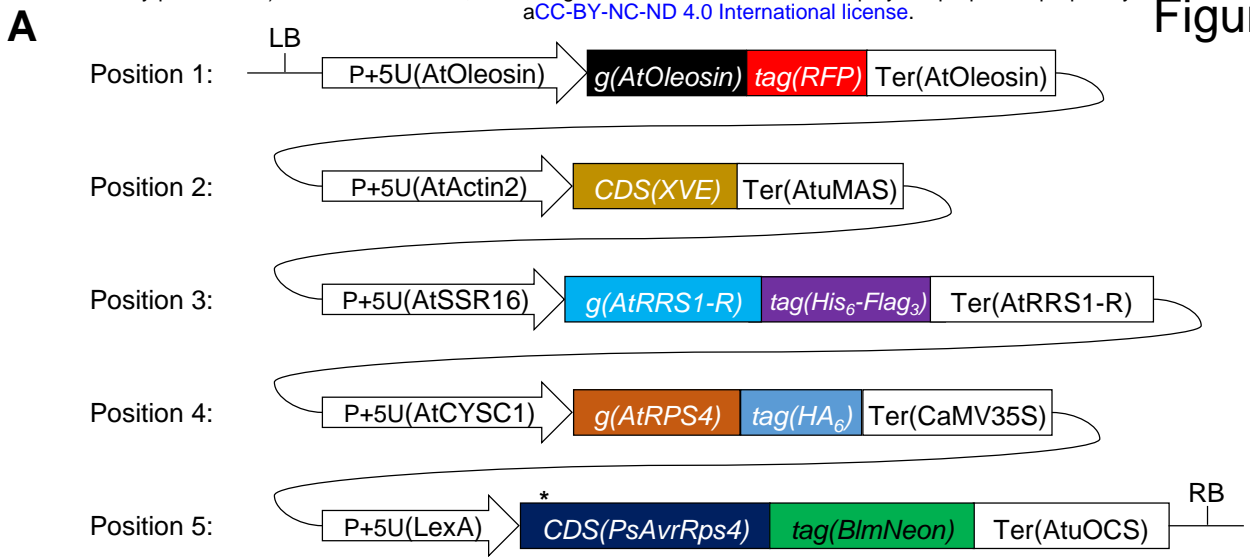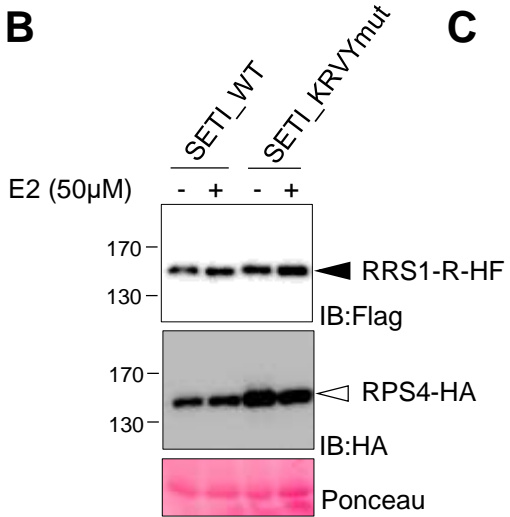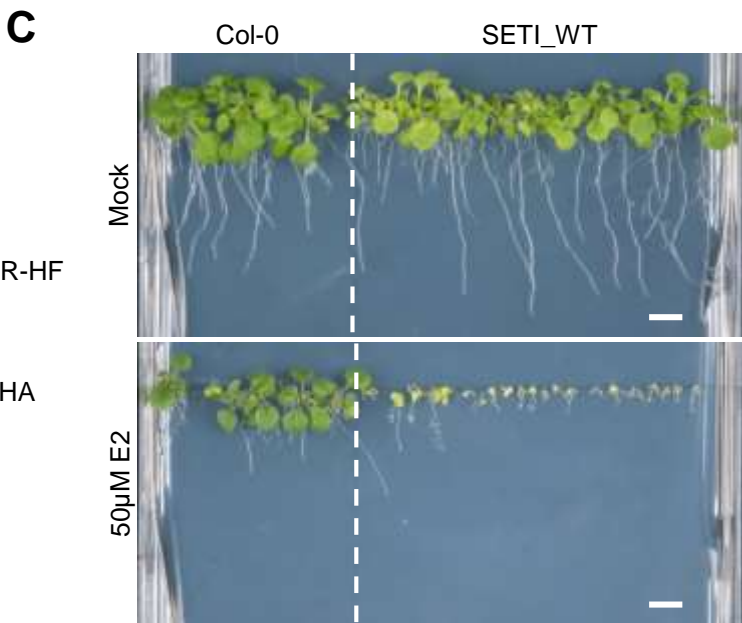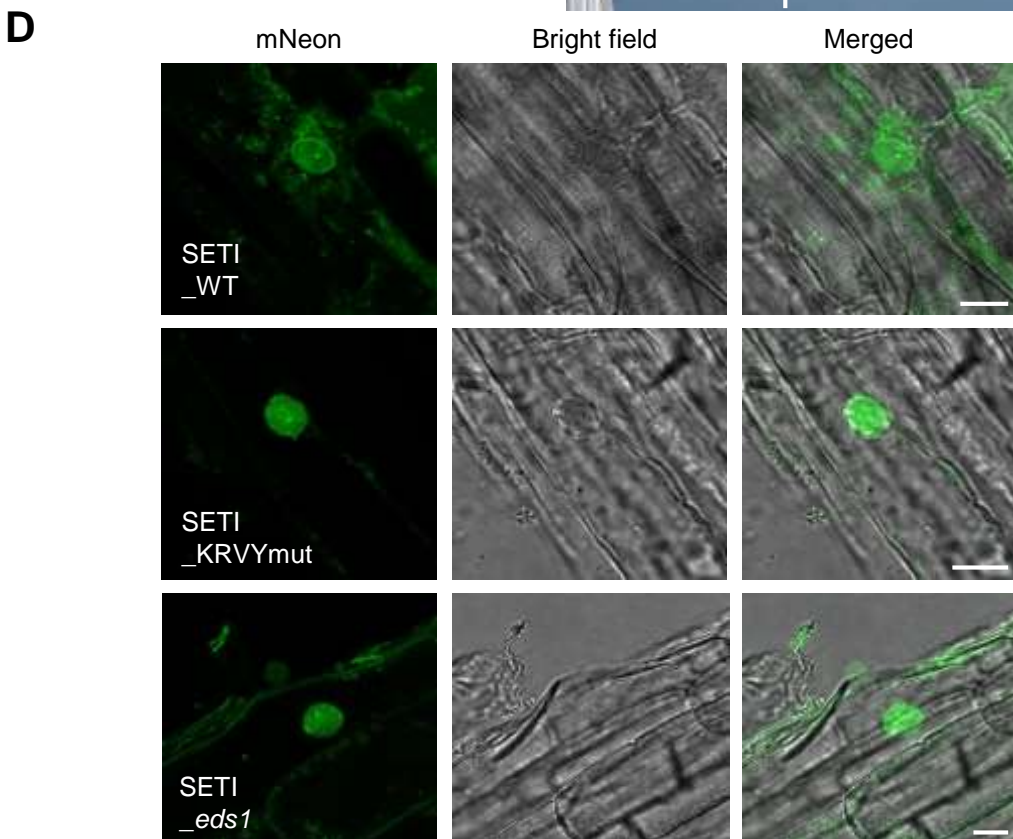



**Fig 2.** Single T-DNA expresses RRS1-R-HF, RPS4-HA and inducible wild-type AvrRps4 or AvrRps4 mutant variants

(A) Illustrative layout of the SUPER-ETI (SETI) construct. There are five individual expression units or Golden Gate Level 2 positional components listed, which are indicated position 1 to position 5. Position 1; expression unit of the FastRed selection marker (Shimada et al. 2010). Position 2, 5; chimeric transactivator XVE (LexA-VP16-ER) and the corresponding LexA inducible system to express AvrRps4 or its mutant variants under the control of  $\beta$ -estradiol (E2) treatment. Position 3, 4; full-length RRS1-R and RPS4 proteins with epitope tags His<sub>6</sub>-Flag<sub>3</sub> and HA<sub>6</sub>, respectively. All cloning details can be found in Methods and Materials. All individual units used for construct assembly can be found in the Supplemental Table 2 and 3.

(B) Protein accumulation of RRS1-R-HF (IB:Flag, black arrowhead) and RPS4-HA (IB:HA, white arrowhead) of SETI lines expressing AvrRps4 (SETI\_WT) or mutant AvrRps4 KRVY-AAAA (SETI\_KRVYmut). Seedlings were grown in liquid culture and induced with 50 $\mu$ M E2 for 2 hours at 7 days after germination (DAG). Ponceau staining of Rubisco large subunits were used as loading control.

(C) Seedling phenotype of SETI Arabidopsis transgenic line at 14 DAG in GM media containing Mock (0.1% DMSO) or 50 $\mu$ M E2. Col-0 was sown as control for the effect of E2 on seedling growth. Scale bar = 0.5cm

(D) Confocal images of SETI\_WT, SETI\_KRVYmut, SETI\_eds1 root cells expressing AvrRps4-mNeon and AvrRps4<sup>KRVY-AAAA</sup>-mNeon induced by 50 $\mu$ M E2 for 24h. mNeon channel shows nucleo-cytoplasmic localization of AvrRps4-mNeon and AvrRps4<sup>KRVY-AAAA</sup>-mNeon. Bright field channel and merged image of mNeon and Bright field channel are shown together. Bars = 10  $\mu$ m.

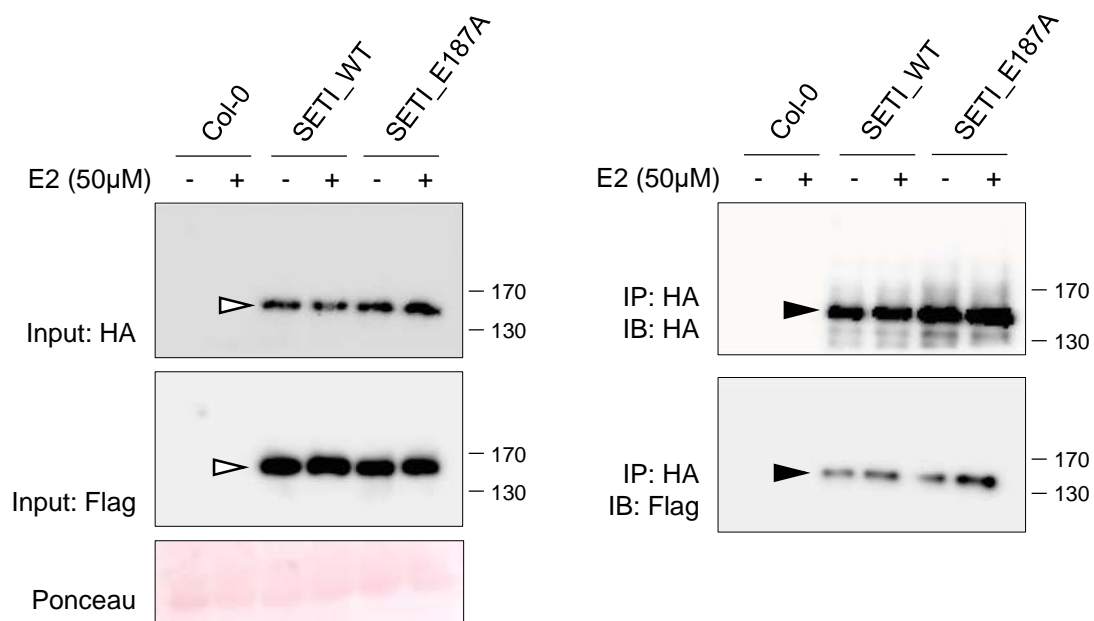

**Fig 3.** RRS1-R and RPS4 interact *in vivo*.

Co-immunoprecipitation of RRS1-R-HF with RPS4-HA. *Col-0*, *SET1\_WT*, and *SET1\_E187A* seedlings at DAG7 were treated with 50µM E2 for 3hours. Crude extracts were centrifuged and RPS4-HA proteins were immunoprecipitated with Anti-HA-conjugated beads. Immunoprecipitation of RPS4-HA, and co-immunoprecipitation of RRS1-R-HF were determined by immunoblot analysis with HA (IB:HA) or Flag (IB:Flag). Ponceau staining indicates equal loading of the input samples. RRS1-R-HF (black arrowhead), and RPS4-HA (white arrowhead) are indicated.



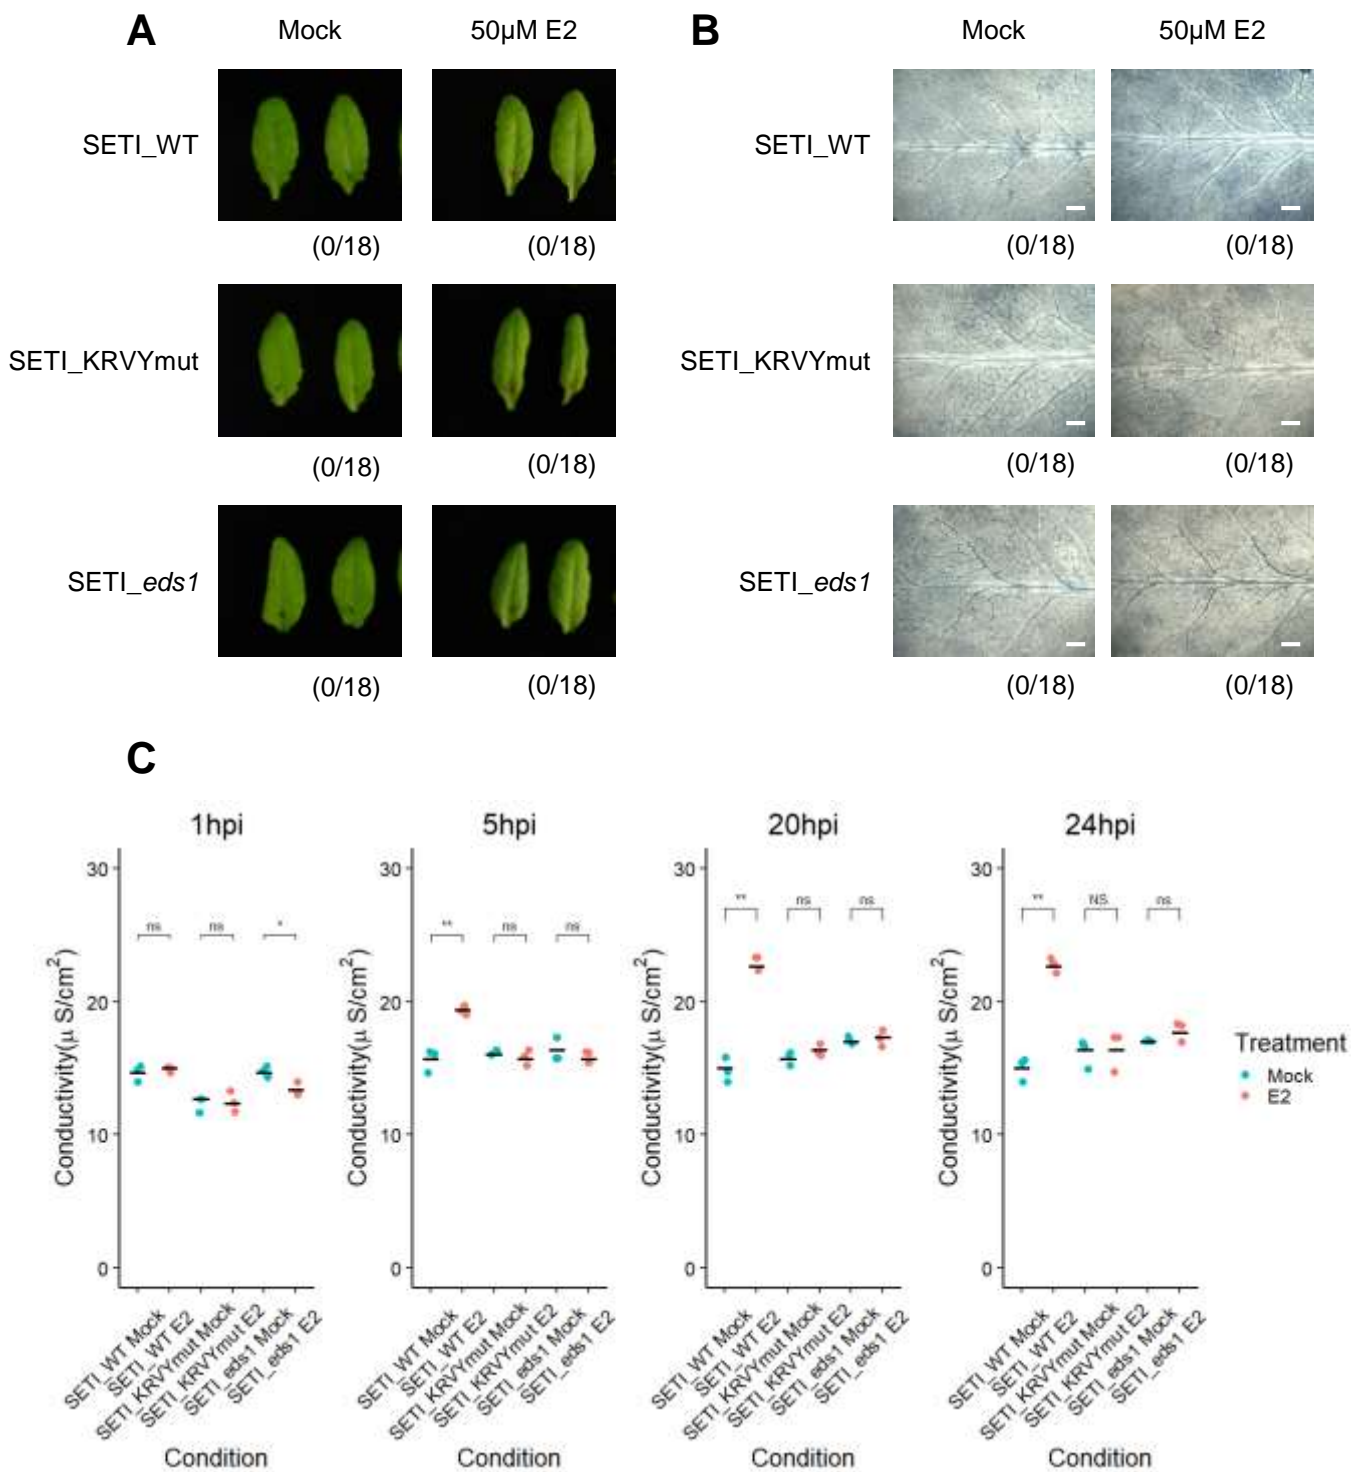

**Fig. 4.** Induced expression of AvrRps4 in *Arabidopsis* cause microscopic but not macroscopic cell death.

(A) HR phenotype assay in *Arabidopsis*. 5-week old SETI\_WT, SETI\_KRVYmut and SETI\_eds1 leaves were infiltrated with Mock (1% DMSO) or 50 $\mu$ M E2. Images were taken at 1dpi. Numbers indicate the number of leaves displaying cell death from the total number of infiltrated leaves (18 for each genotype and treatment).

(B) Trypan blue staining. 5-week old SETI\_WT, SETI\_KRVYmut and SETI\_eds1 were infiltrated with Mock (1% DMSO) or 50 $\mu$ M E2. Leaves were stained with trypan blue solution at 1dpi. After destaining, leaves were imaged using stereoscopic microscope. Scale bar = 0.5mm

(C) Electrolyte leakage assay. 5-week old SETI\_WT, SETI\_KRVYmut and SETI\_eds1 leaves were infiltrated with Mock (1% DMSO) or 50 $\mu$ M E2. Fifteen leaf discs were collected for each data point. Conductivity was measured at 1, 5, 20 and 24 hours post infiltration (hpi). Each data point represents one technical replicate and three technical replicates are included per treatment and genotype for one biological replicate. Black line represents the mean of the technical replicates. This experiment was repeated three times independently with similar results (Supplemental Figure 2). Significant differences relative to the mock treatment in each genotype was calculated with t-test and the P-values are indicated as ns (non-significant),  $P > 0.05$ ; \*,  $P < 0.05$ ; \*\*,  $P < 0.01$ ; \*\*\*,  $P < 0.001$ .

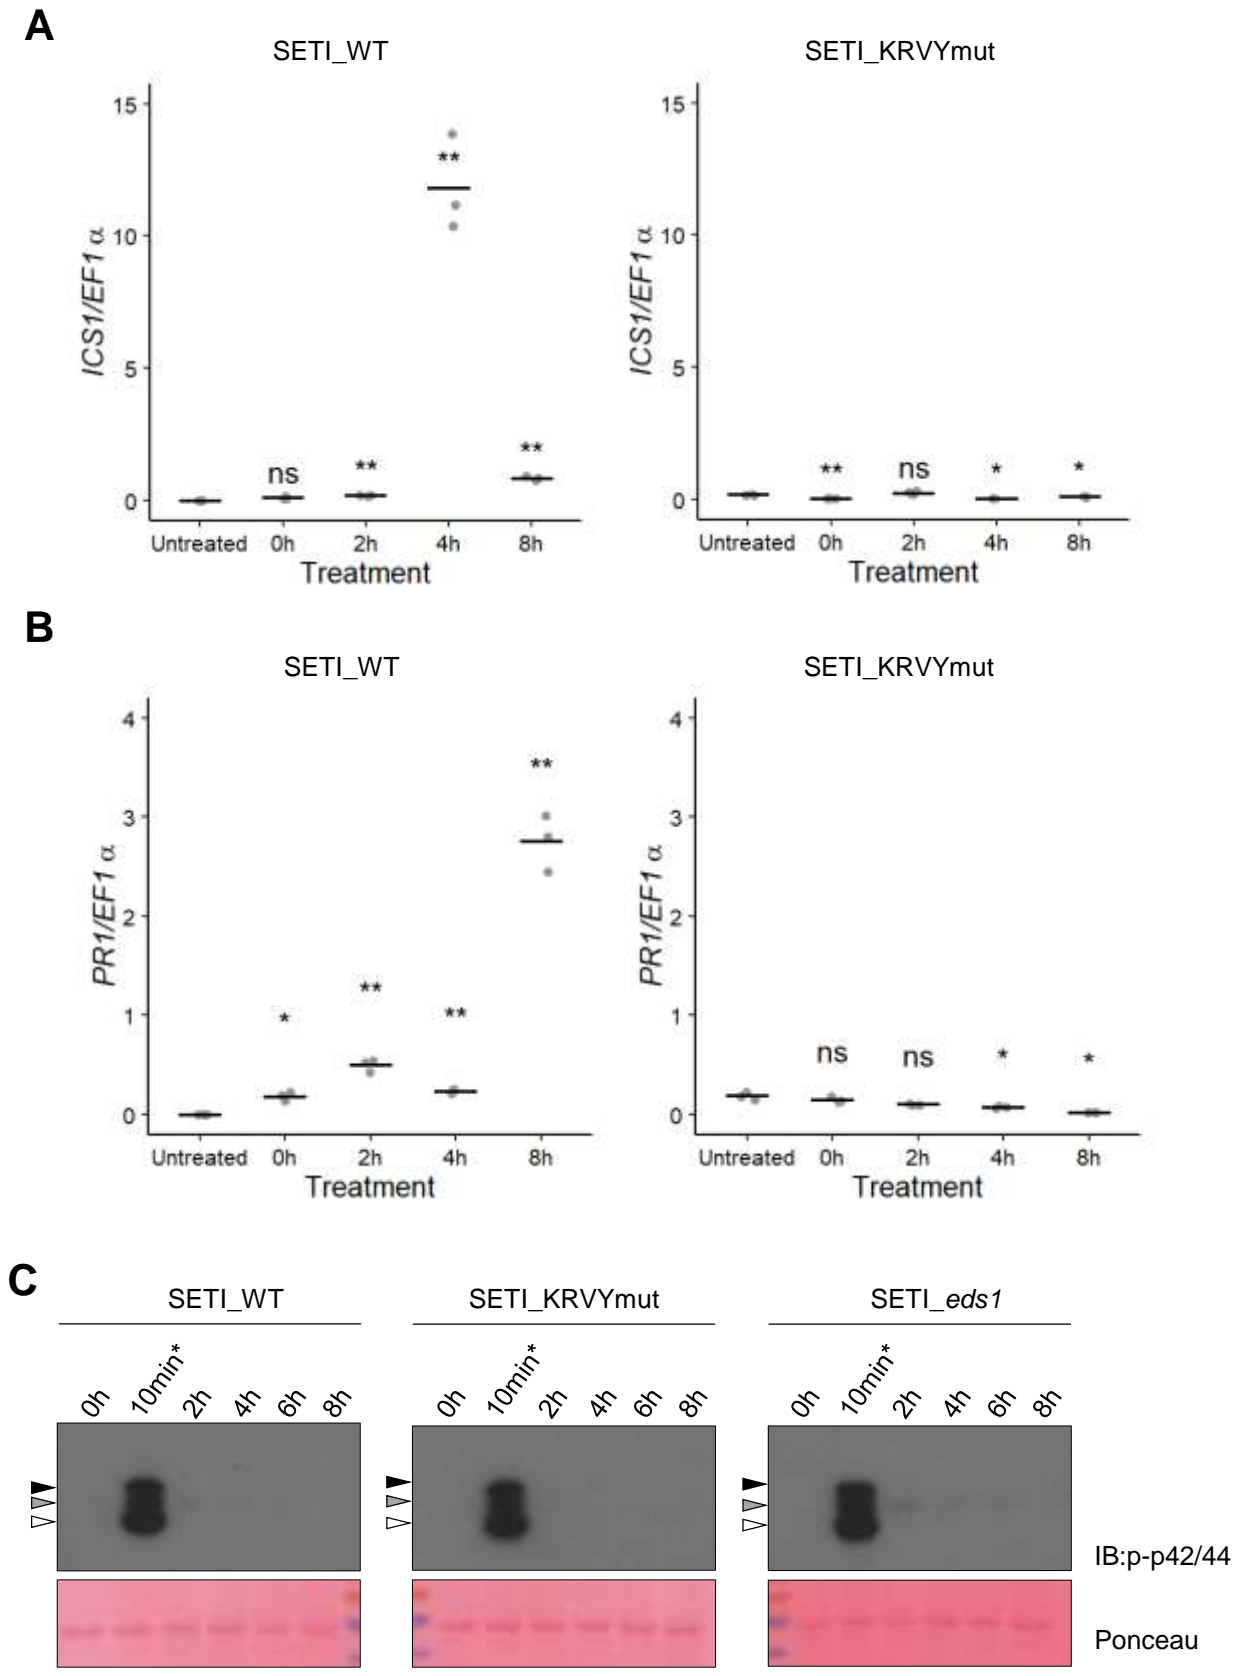

**Fig. 5.** Induced expression of AvrRps4 in *Arabidopsis* leads to *ICS1* and *PR1* expression, but not MAPK activation.

(A and B) *ICS1* (A) and *PR1* (B) expression after induction with E2 for 2, 4, and 8h in SET1 (left panel) and SET1\_KRVYmut (right panel) leaf samples. 5-week old SET1 and SET1\_KRVYmut leaves were infiltrated with 50  $\mu$ M E2. Samples were collected at 0, 2, 4 and 8hpi for RNA extraction and subsequent qPCR. Expression level is presented as relative to *EF1 $\alpha$*  expression. Each data point represents one technical replicate. Black line represents the mean of the technical replicates. This experiment was repeated three times independently with similar results. Significant differences relative to the Untreated samples was calculated with t-test and the P-values are indicated as ns (non-significant),  $P > 0.05$ ; \*,  $P < 0.05$ ; \*\*,  $P < 0.01$ ; \*\*\*,  $P < 0.001$ .

(C) Activation of MAP kinases in SET1\_WT, SET1\_KRVYmut and SET1\_eds1 seedlings by E2-induction of effector AvrRps4 or mutant AvrRps4<sup>KRVY-AAAA</sup>. Seedlings grown in liquid culture at 7 dag were treated with 50 $\mu$ M E2 for indicated time points (0, 2, 4, 6, 8h) and collected for samples. SET1\_WT, SET1\_KRVYmut and SET1\_eds1 seedlings treated with 100nM flg22 for 10 minutes (10min\*) were used as positive control. Proteins were extracted from these seedlings and phosphorylated MAP kinases were detected using p-p42/44 antibodies. Arrowheads indicate phosphorylated MAP kinases (black; pMPK6, grey; pMPK3, white; pMPK4/11). Ponceau staining were used as loading control.

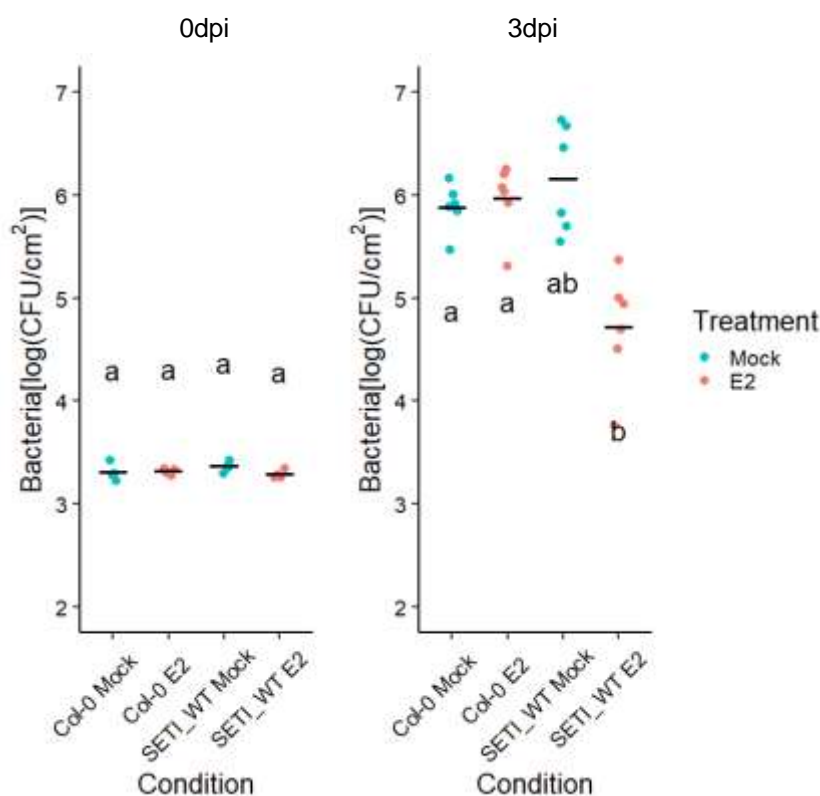

**Fig. 6.** Effector-triggered immunity triggered by the expression of AvrRps4 leads to resistance against *Pseudomonas syringae* pv. *tomato* strain DC3000.

5-week old SETI\_WT and Col-0 leaves were infiltrated with Mock (1% DMSO) or 50 $\mu$ M E2. At 1dpi, leaves were inoculated with *Pst*DC3000 (OD<sub>600</sub>=0.001). Bacteria in the leaves were then quantified as colony-forming units (CFU) at 0dpi and 3dpi. Each data point represents two leaves collected from one individual plant. Samples from four individual plants were collected for 0 dpi and samples from six individual plants were collected for 3 dpi. Black line represents the mean of the technical replicates. This experiment was repeated three times independently with similar results. Biological significance of the values were determined by one-way ANOVA followed by post hoc TukeyHSD analysis. Letters above the data points indicate significant differences (P<0.05).
